# Supplementary material for: Unraveling the Impact of Acetylation Patterns in Chitosan Oligomers on Cu2+ Ion Binding: Insights from DFT Calculations
Source: MDPI journal article supplement (doi:10.3390/ijms241813792), 2023-09-07
Supplement: s1 [file s1]

# Unraveling the Impact of Acetylation Patterns in Chitosan Oligomers on Cu<sup>2+</sup> Ion Binding: Insights from DFT Calculations

Ratna Singh <sup>1,\*</sup>, Jens Smiatek <sup>2</sup> and Bruno M. Moerschbacher <sup>1,\*</sup>

<sup>1</sup> Institute for Biology and Biotechnology of Plants, University of Münster, Schlossplatz 8, 48143 Münster, Germany

<sup>2</sup> Institute for Computational Physics, Universität Stuttgart, Allmandring 3, 70569 Stuttgart, Germany; smiatek@icp.uni-stuttgart.de

\* Correspondence: singhr@uni-muenster.de (R.S.); moersch@uni-muenster.de (B.M.M.)

## Supplementary

**Table S1** Distance between Cu<sup>2+</sup> and 3'O or 2'N in GlcN- Cu<sup>2+</sup> (M) complexes in bridge and pendant form

| coordination method  |         | tetra BLYP Å | penta BLYP Å | hexa BLYP Å |
|----------------------|---------|--------------|--------------|-------------|
| Cu-3'OH              |         |              |              |             |
|                      | bridge  | 2.0          | 2.1          | 2.3         |
| Cu-2'NH <sub>2</sub> |         |              |              |             |
| i)                   | bridge  | 2.0          | 2.0          | 2.0         |
| ii)                  | pendant | 2.0          | 2.0          | 2.0         |

**Table S2** Free energy of complex formation and bond dissociation energy of GlcN- Cu<sup>2+</sup> (M) complexes

| coordination method |                     | tetra BLYP kcal/mol | penta BLYP kcal/mol | hexa BLYP kcal/mol |
|---------------------|---------------------|---------------------|---------------------|--------------------|
| GlcN-Cu bridge      |                     |                     |                     |                    |
| i)                  | free energy         | -69.9               | -40.7               | -20.9              |
| ii)                 | dissociation energy | 85.7                | 52.7                | 30.8               |
| GlcN-Cu pendant     |                     |                     |                     |                    |
| i)                  | free energy         | -36.7               | -23.1               | -12.9              |
| ii)                 | dissociation energy | 52.7                | 34.1                | 28.7               |

**Table S3** Distance between  $\text{Cu}^{2+}$  and 3'O or 2'N in GlcN- $\text{Cu}^{2+}$  (M) complexes within chitosan dimers and trimers (D = GlcN; A = GlcNAc)

|                                                      | 2'N- $\text{Cu}^{2+}$<br>(Å) | 3'O- $\text{Cu}^{2+}$<br>(Å) |
|------------------------------------------------------|------------------------------|------------------------------|
| GlcN-(GlcN with $\text{Cu}^{2+}$ ), (D-M)            | 2.0                          | 2.1                          |
| (GlcN with $\text{Cu}^{2+}$ )-GlcN, (M-D)            | 2.0                          | 2.2                          |
| (GlcN with $\text{Cu}^{2+}$ )-GlcNAc, (M-A)          | 2.0                          | 2.3                          |
| GlcNAc-(GlcN with $\text{Cu}^{2+}$ ), (A-M)          | 2.0                          | 2.1                          |
| GlcN-GlcN-(GlcN with $\text{Cu}^{2+}$ ), (D-D-M)     | 2.0                          | 2.1                          |
| GlcN-(GlcN with $\text{Cu}^{2+}$ )-GlcN, (D-M-D)     | 2.0                          | 2.4                          |
| (GlcN with $\text{Cu}^{2+}$ )-GlcN-GlcN, (M-D-D)     | 2.0                          | 2.3                          |
| GlcNAc-(GlcN with $\text{Cu}^{2+}$ )-GlcN, (A-M-D)   | 2.0                          | 2.5                          |
| GlcN-(GlcN with $\text{Cu}^{2+}$ )-GlcNAc, (D-M-A)   | 2.0                          | 2.2                          |
| GlcNAc-(GlcN with $\text{Cu}^{2+}$ )-GlcNAc, (A-M-A) | 2.0                          | 2.4                          |

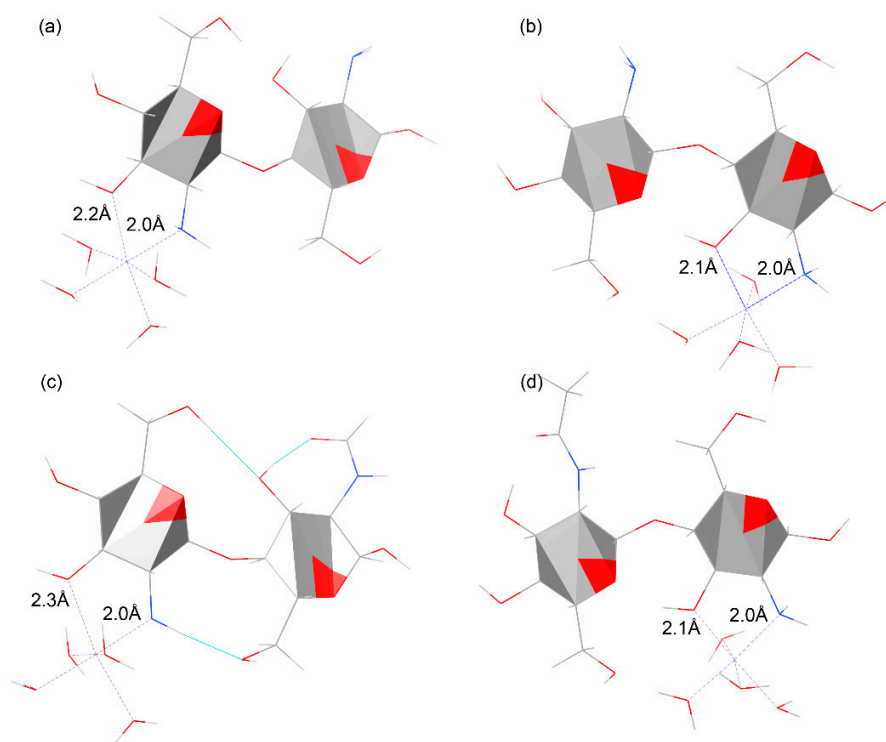

**Figure S1** Distance between  $\text{Cu}^{2+}$  and 3'O or 2'N in GlcN- $\text{Cu}^{2+}$  (M) complexes within chitosan dimers after geometry optimization, using the BLYP functional; a) GlcN-GlcN with  $\text{Cu}^{2+}$  bound to the non-reducing end GlcN (M-D); b) GlcN-GlcN with  $\text{Cu}^{2+}$  bound to the reducing end GlcN (D-M); c) GlcN-GlcNAc with  $\text{Cu}^{2+}$  bound to the GlcN (M-A); d) GlcNAc-GlcN with  $\text{Cu}^{2+}$  bound to the GlcN (A-M). Increasing bond length between  $\text{Cu}^{2+}$  and 3'O indicates weaker interactions.

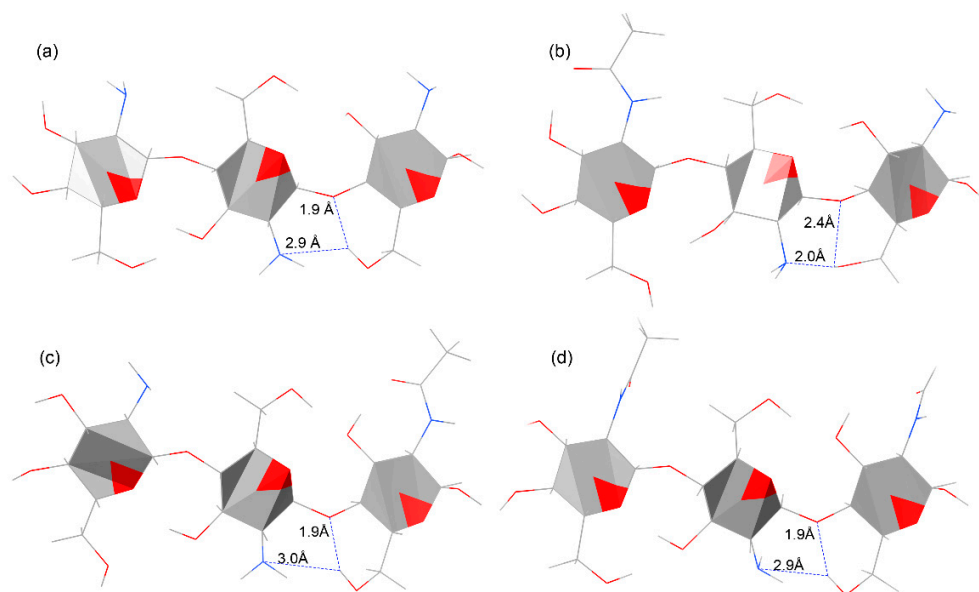

**Figure S2** Intramolecular interaction in the chito-oligomers a) GlcN-GlcN-GlcN (D-D-D); b) GlcNAc-GlcN-GlcN (A-D-D); c) GlcN-GlcN-GlcNAc (D-D-A); d) GlcNAc-GlcN-GlcNAc (A-D-A). In ADD, intramolecular interactions and their bond length were mapped differently compared to DDD, DDA and ADA.

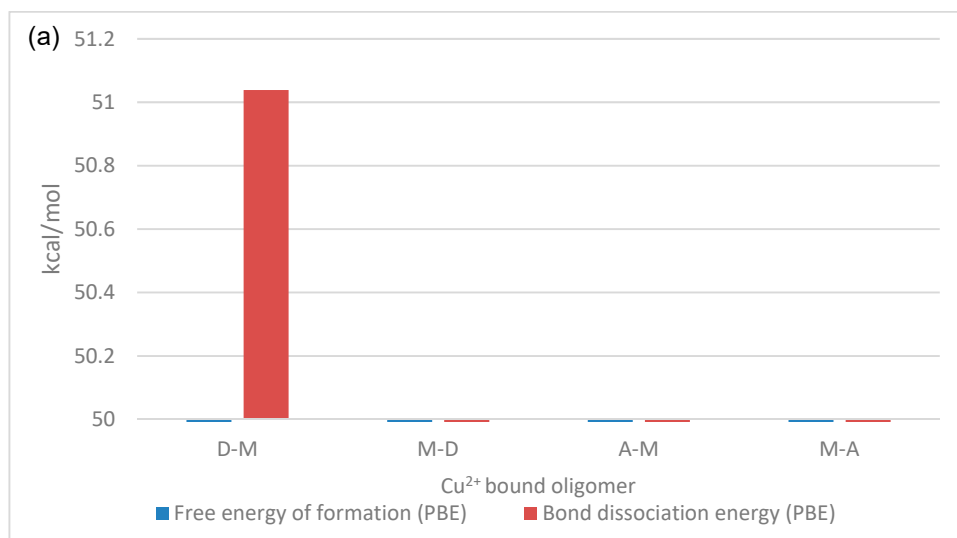

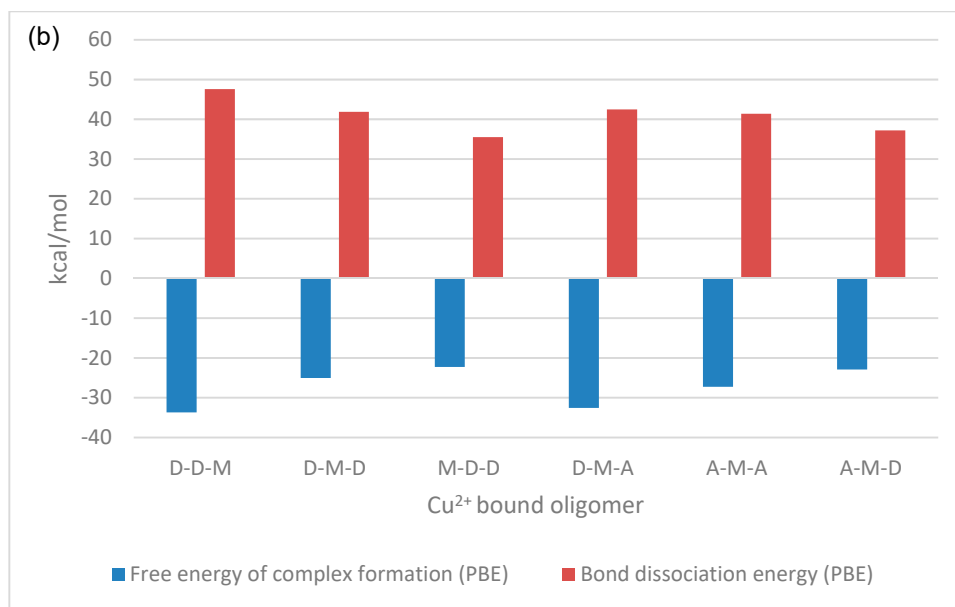

**Figure S3** Free energy of copper-chitosan complex formation (a) chitosan dimers (b) selected chitosan trimers calculated using PBE, where M represents the complex of GlcN and Cu<sup>2+</sup> bound to the 2'NH<sub>2</sub> and 3'OH sites of the same subunit; A = GlcNAc, D = GlcN, M = GlcN-Cu<sup>2+</sup> complex.

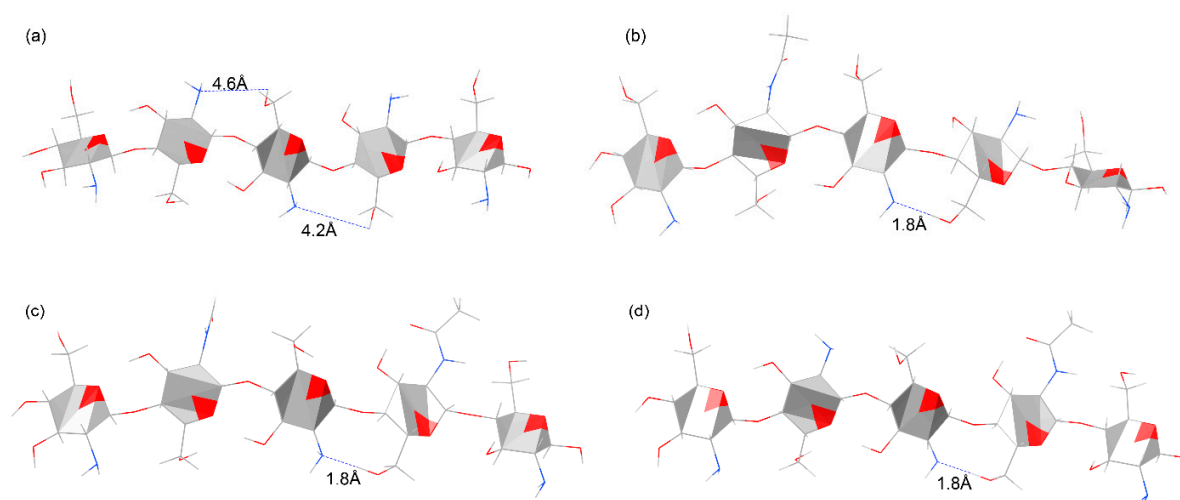

**Figure S4** Intramolecular interaction between 2'N and 6'H in neighboring units within chitosan pentamers; a) GlcN-GlcN-GlcN-GlcN-GlcN (D-D-D-D-D); b) GlcN-GlcNAc-GlcN-GlcN-GlcN (D-A-D-D-D); c) GlcN-GlcNAc-GlcN-GlcNAc-GlcN (D-A-D-A-D); d) GlcN-GlcN-GlcN-GlcNAc-GlcN (D-D-D-A-D). New intramolecular interaction in the partially acetylated oligomers indicates the influence of acetylated group on the structure and their polarity.

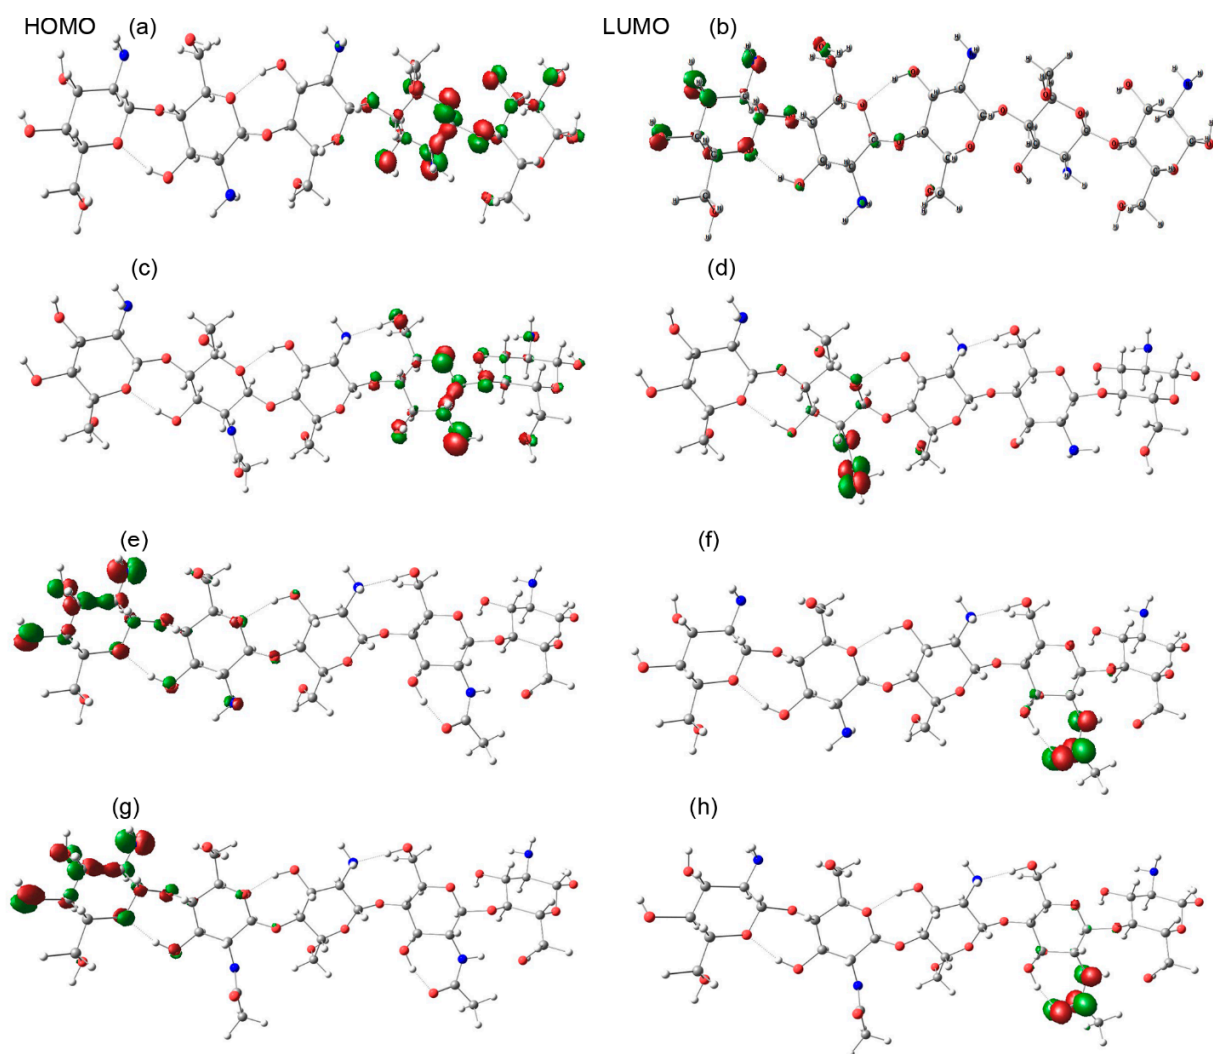

**Figure S5** Positions of HOMO and LUMO in chitosan pentamers; a) GlcN-GlcN-GlcN-GlcN-GlcN (D-D-D-D-D), HOMO; b) GlcN-GlcN-GlcN-GlcN-GlcN (D-D-D-D-D), LUMO; c) GlcN-GlcNAc-GlcN-GlcN-GlcN (D-A-D-D-D), HOMO; d) GlcN-GlcNAc-GlcN-GlcN-GlcN (D-A-D-D-D), LUMO; e) GlcN-GlcN-GlcN-GlcNAc-GlcN (D-D-D-A-D), HOMO; f) GlcN-GlcN-GlcN-GlcNAc-GlcN (D-D-D-A-D), LUMO; g) GlcN-GlcNAc-GlcN-GlcNAc-GlcN (D-A-D-A-D), HOMO; h) GlcN-GlcNAc-GlcN-GlcNAc-GlcN (D-A-D-A-D), LUMO.
